# Supplementary material for: Risk of Weight Loss in Adult Patients and the Effect of Staffing Registered Dietitians in Kaifukuki (Convalescent) Rehabilitation Wards: A Retrospective Analysis of a Nationwide Survey
Source: MDPI journal article supplement (doi:10.3390/healthcare9060753), 2021-06-18
Supplement: s1 [file s1]

**Table S1.** Obligations and recommendations for registered dietitians (RDs) in the Kaifukuki (convalescent) rehabilitation wards.

| Obligations <sup>1</sup>                                                                                                                                                                                                                                                                                                                                                                                                                                                                                                                         |
|--------------------------------------------------------------------------------------------------------------------------------------------------------------------------------------------------------------------------------------------------------------------------------------------------------------------------------------------------------------------------------------------------------------------------------------------------------------------------------------------------------------------------------------------------|
| RDs must include the nutritional status of all patients while planning the rehabilitation programs. Nutrition-related information must be included on the form of the rehabilitation program as follows: height, body weight, body mass index, nutritional status, total energy and protein requirements, provided energy and protein, type of nutrition support (oral intake, oral nutritional supplements, enteral nutrition via naso-gastric tube or gastrostomy, partial or total parenteral nutrition), and need for texture-modified diet. |
| RDs must assess and re-assess the nutritional status of patients at admission and on a regular basis, and if applicable, must arrange a nutrition care plan in collaboration with the medical doctor, nurses, and other healthcare staff.                                                                                                                                                                                                                                                                                                        |
| The nutritional status of patients with malnutrition, at risk of malnutrition or other statuses that require specific nutritional support must be monitored at least once a week, and should be provided appropriate nutritional support in consideration of the nutrition monitoring, to regain a healthy nutritional status.                                                                                                                                                                                                                   |
| RDs must make a nutritional care plan for all patients who need nutritional support.                                                                                                                                                                                                                                                                                                                                                                                                                                                             |
| RDs must provide nutritional education to relevant patients.                                                                                                                                                                                                                                                                                                                                                                                                                                                                                     |
| Recommendations (apart from the obligations) <sup>2</sup>                                                                                                                                                                                                                                                                                                                                                                                                                                                                                        |
| RDs should apply appropriate nutrition screening tools and construct a nutrition screening system in collaboration with the nursing and other healthcare staff.                                                                                                                                                                                                                                                                                                                                                                                  |
| RDs should collect data on activities of daily living of the patients.                                                                                                                                                                                                                                                                                                                                                                                                                                                                           |
| RDs should collect the data on the swallowing function of patients.                                                                                                                                                                                                                                                                                                                                                                                                                                                                              |
| RDs should calculate the energy, protein and other relevant nutritional requirements for each patient.                                                                                                                                                                                                                                                                                                                                                                                                                                           |
| RDs should participate in rehabilitation conferences to share and discuss nutritional status, goals, and care plans for patients.                                                                                                                                                                                                                                                                                                                                                                                                                |
| RDs should arrange the nutritional care plan in consideration of the nutritional status, living conditions, willingness, swallowing function, ability to perform daily activities, and socio-economic status of the patients.                                                                                                                                                                                                                                                                                                                    |

<sup>1</sup> Referred by the public healthcare insurance policy in Japan. <sup>2</sup> Referred by “Vade mecum for registered dietitians in Kaifukuki Rehabilitation Wards” edited by the Kaifukuki Rehabilitation Ward Association Nutrition Committee.

**Table S2.** Summary of the characteristics of the 1889 Kaifukuki (convalescent) Rehabilitation Wards that responded to the survey.

| Factor                                          | All           | KRWs Class 1 * | KRWs Class 2-6 † | p Value             |
|-------------------------------------------------|---------------|----------------|------------------|---------------------|
| Number of wards, (%)                            | 1889          | 1150 (60.9)    | 739 (39.1)       | —                   |
| Number of covered prefectures, (%)              | 47 (100)      | 47 (100)       | 47 (100)         | —                   |
| Staffed RD, (%)                                 | 1188 (62.9)   | 840 (70.7)     | 348 (29.3)       | <0.001 <sup>1</sup> |
| Exclusively staffed RD, (%)                     | 296 (15.7)    | 236 (20.5)     | 60 (8.1)         | <0.001 <sup>1</sup> |
| Number of physicians, median (IQR)              | 1 (1–1)       | 1 (1–1)        | 1 (1–1)          | 0.007 <sup>2</sup>  |
| Number of nurses, median (IQR)                  | 19 (16–23)    | 21 (18–24)     | 17 (14–20)       | <0.001 <sup>2</sup> |
| Daily rehabilitation dose (min/d), median (IQR) | 134 (106–158) | 144 (116–162)  | 118 (90–146)     | <0.001 <sup>2</sup> |

<sup>1</sup> Chi-square test, <sup>2</sup> Mann–Whitney U-test. IQR, interquartile range; RD, registered dietitian; KRWs Kaifukuki Rehabilitation Wards. \* obligated to provide nutrition care, † Not obligated to provide nutrition care.

**Table S3.** Multiple linear regression analysis of BMI at discharge in the KRWs where nutrition care was not provided (class 2–6).

| Factor                                                 | B         | 95%CI of B |        | $\beta$ | <i>p</i> Value |
|--------------------------------------------------------|-----------|------------|--------|---------|----------------|
|                                                        |           | Lower      | Upper  |         |                |
| Age                                                    | −0.007    | −0.009     | −0.005 | −0.033  | <0.001         |
| Sex, male                                              | 0.002     | −0.019     | 0.023  | 0.001   | 0.860          |
| Disease                                                |           |            |        |         |                |
| Stroke                                                 | Reference |            |        |         |                |
| Other neurological diseases/ injuries                  | 0.107     | 0.047      | 0.167  | 0.026   | 0.001          |
| Orthopaedic diseases/ injuries                         | −0.006    | −0.042     | 0.030  | −0.002  | 0.736          |
| Hospital-associated deconditioning                     | −0.015    | −0.070     | 0.041  | −0.004  | 0.607          |
| Days between onset and admission                       | 0.004     | 0.002      | 0.005  | 0.024   | < 0.001        |
| FIM at admission                                       | 0.005     | 0.004      | 0.006  | 0.056   | < 0.001        |
| BMI at admission                                       | 0.875     | 0.866      | 0.883  | 0.867   | < 0.001        |
| Number of nurses                                       | 0.004     | 0.000      | 0.008  | 0.008   | 0.066          |
| Daily rehabilitation dose (min/d)                      | 0.001     | 0.001      | 0.002  | 0.023   | < 0.001        |
| Exclusively staffed registered dietitian (≥1 per ward) | 0.025     | −0.007     | 0.058  | 0.006   | 0.128          |

BMI, body mass index; B, standardised partial regression coefficient;  $\beta$ , partial regression coefficient; CI, confidence interval; FIM, Functional Independence Measure,  $R^2 = 0.783$ .
